# Supplementary material for: Identifying the Dominant Personality Profiles in Medical Students: Implications for Their Well-Being and Resilience
Source: PLoS One. 2016 Aug 5;11(8):e0160028. doi: 10.1371/journal.pone.0160028 (PMC4975484; doi:10.1371/journal.pone.0160028)
Supplement: S1 Dataset — (XLSX) [file pone.0160028.s001.xlsx]

## Sheet: DataforLPAdemo_N808
year	age	sex	cob	rural	yearmedschool	NS	HA	RD	PS	SD	CO	ST
2014	2	1	2	0	3	3.1	2.85	3.55	2.9	3	3.7	2.0625
2014	2	1	2	0	3	2.35	2.45	3.05	3.95	4.5	4.45	3.875
2014	2	1	2	0	4	2.4	3.15	2.65	2.95	3.15789	3.5	1.5625
2014	2	1	2	0	4	2.42105	2.9	3.25	2.9	3.25	4.05263	3
2014	2	1	2	0	3	3.3	2.05	3.2	3.65	3.4	3.6	2.4375
2014	2	2	2	0	1	3.25	1.45	2.85	4.55	4.4	3.25	2.8125
2014	2	1	2	0	4	3.45	2.42105	2.75	3.7	3.85	3.78947	3.25
2014	2	2	2	0	1	3	4.3	2.95	4.47368	3.5	4	1.6875
2014	2	2	2	0	1	2.42105	2.85	3.25	3.31579	4.52632	4.4	2.875
2014	1	2	2	0	1	2.85	2.3	2.65	3.15	3.25	4.4	2.25
2014	2	1	2	0	2	2.9	2.2	2.95	3	3.75	4.35	3.25
2014	2	1	2	0	3	1.9	2.9	3.25	2.95	3.7	4.1	1.75
2014	2	1	2	0	2	2.75	1.7	3.2	4.25	4.5	4.35	2.3125
2014	2	1	2	0	2	2.6	1.55	3	2.85	4.3	4.31579	4.0625
2014	2	1	2	0	2	2.3	1.4	3.05	3.9	4.05	4.45	3.375
2014	2	2	2	0	1	1.9	3.7	3	4.75	4.3	4.2	2
2014	2	2	2	0	3	2.5	3.2	2.9	3.75	3.6	3.7	3
2014	2	2	2	0	1	2.6	2.75	2.75	3.5	3.45	3.75	3.0625
2014	2	2	2	0	4	2.35	2.2	2.9	3.75	4.21053	2.9	1.4375
2014	2	1	2	0	4	2.85	2.85	3.2	3.8	3.2	3.2	3.5
2014	2	2	2	0	4	2.8	3.45	2.5	3.5	3.6	3.95	3.3125
2014	1	2	2	0	3	2.2	3.45	3.1	3.5	3.7	3.5	2.26667
2014	1	2	2	0	4	2.45	3.3	2.85	4.5	3	3.85	3.25
2014	1	2	2	0	4	3.15	3.35	2.8	3.6	3.25	3.65	2.3125
2014	1	2	2	0	4	2.6	3.35	2.75	3.5	3.25	4.05	3.75
2014	1	1	2	0	4	3.45	1.95	2.9	3.6	3.6	3.95	2.8125
2014	1	2	2	0	1	2.73684	2.45	3.15789	4.25	4.35	4.25	3.75
2014	1	2	2	0	2	2.8	2.65	3.1	4.15789	4.3	3.7	2.8125
2014	1	1	2	0	2	2.7	2.3	2.8	4.3	3.8	2.2	1.625
2014	1	1	2	0	4	2.2	3.1	3.25	3.85	3.85	3.8	2.4375
2014	1	1	2	0	1	3.65	2	2.9	4	3.55	4.1	3.4375
2014	1	1	2	0	2	2.85	3.05	3.05	4.05	4	4.2	4.1875
2014	1	2	2	0	4	2.95	3.25	3.05	3.5	2.4	2.6	1.625
2014	1	2	2	0	4	3.05	2.95	2.9	3.75	3.5	4.1	2.9375
2014	1	1	2	0	4	3.3	2.35	3	3.25	3.5	3.5	2.4375
2014	2	2	2	0	3	2.65	3.05	3.05	4.3	3.8	4	3.0625
2014	2	1	2	0	3	3.2	2.65	2.4	3.6	2.9	3.1	2.8125
2014	1	2	2	0	3	3	2.35	3.2	3.4	3.9	4.2	3.625
2014	2	1	2	0	3	3.05	2.8	2.7	3.35	3.1	3.5	3.6875
2014	2	2	2	0	4	2.7	1.95	2.89474	4	4.6	4.25	2.25
2014	1	2	2	0	3	2.85	2.95	3	3.65	3.85	4.2	3.66667
2014	2	1	2	0	3	2.15	3.2	2.65	3.55	3.65	3.15	2.4375
2014	2	1	2	0	4	3.15	3.05	2.9	2.55	2.7	3	2
2014	2	1	2	0	4	3.55	1.2	2.9	3.8	4.45	3.25	2.75
2014	1	1	2	0	1	2.4	2.6	3.2	3.52632	3.75	3.9	2.75
2014	1	2	2	0	3	2.4	3.8	2.75	3.25	4.2	3.55	2.125
2014	1	2	2	0	3	2.5	3.1	2.78947	4.1	3.4	4.05	1.875
2014	1	1	2	0	3	2.8	2.95	3.4	3.75	3.25	4.1	2.8125
2014	1	1	2	0	3	2.42105	2.75	3.05	3.45	3.68421	3.4	1.9375
2014	1	2	2	0	1	2.25	4.3	2.8	3.95	2.85	3.45	2.375
2014	1	1	2	0	2	2.95	2	2.9	3.55	3.75	3.8	3.0625
2014	1	2	2	0	3	2.2	2.6	3.25	3.9	3.95	3.35	2.5625
2014	2	1	2	0	4	2.3	2.2	3.65	4	4.6	4.9	2.3125
2014	2	2	2	0	4	3.15	2.05	2.95	4.45	4.15	4.15	3.375
2014	2	1	2	0	4	3.2	2.7	3.1	3.21053	3	3.45	3
2014	2	1	2	0	4	3.3	3.5	3.05	3.25	3.3	3.85	3.1875
2014	2	1	2	0	3	2.4	1.6	3.35	4.7	4.9	4.35	2.1875
2014	2	2	2	0	3	2.6	2.45	2.85	3.45	3.4	3.5	3.6875
2014	2	2	2	0	3	2.47368	3.7	2.8	3.45	3.15	3.85	3.0625
2014	2	2	2	0	4	2.45	2.5	3.4	4.4	3.85	4.35	1.625
2014	2	1	2	0	4	1.95	2.75	3.25	3.9	4.05	4.2	2.1875
2014	1	2	2	0	2	2.73684	3.1	3.25	3.05	3.2	3.35	2.4375
2014	2	1	2	0	4	2.85	2.45	3.25	3.65	4.5	3.25	1.25
2014	2	1	2	0	4	2.3	2.25	3.2	4.15	3.9	4.3	3.3125
2014	1	1	2	0	4	2.9	2.85	3.26316	3.85	3.65	3.55	1.2
2014	2	1	2	0	4	2.5	3.15	3	3.8	3.55	4.05	3.25
2014	1	1	2	0	1	1.9	3.8	3.25	2.9	2.8	2.9	1.5625
2014	1	2	2	0	1	2.7	2.8	3	3.68421	3.6	4.45	3.4375
2014	1	1	2	0	1	2.35	3.05	3.35	2.75	3.3	4.2	2.25
2014	2	1	2	0	4	2.85	2.3	3.15	3.8	3.85	4.25	2.75
2014	1	2	2	0	2	2.63158	2.94737	3.05	3.1	3.4	3.85	3.1875
2014	1	2	2	0	2	2.05	2.8	3.1	3.6	3.7	3.85	1.6875
2014	1	2	2	0	2	3.2	2.35	2.95	4.35	3.8	3.4	3.0625
2014	1	1	2	0	2	2.3	3.2	2.95	3	3.15	3.7	2.3125
2014	2	1	2	0	3	2.95	2.6	2.42105	3.65	3.7	3.85	3.75
2014	2	2	2	0	3	2.25	3.3	3.25	3.35	3.85	4.25	2.6875
2014	2	2	2	0	3	2.55	2.65	2.95	3.8	3.3	3.75	2
2014	2	2	2	0	3	3.05	3.35	2.8	3.75	2.9	4	2.8125
2014	2	1	2	0	3	2.73684	2.7	2.95	3.75	2.8	3.35	3.75
2014	1	2	2	0	1	2.55	2.65	3.15	4.15	3.6	3.95	2.73333
2014	2	2	2	0	3	2.35	2.95	3.1	3.95	3.9	4.3	2.9375
2014	2	2	2	0	3	3	3.1	3	3.65	3.6	3.9	3.1875
2014	2	2	2	0	3	2.65	2.2	3.65	3.85	4.3	4.65	3.6875
2014	1	1	2	0	1	2.35	2.75	2.73684	3.75	3.6	4.2	2.0625
2014	2	2	2	0	2	2.35	3.45	2.95	3.65	3.2	3.85	2.4375
2014	2	2	2	0	3	2.78947	3.1	3	3.65	3.45	4.65	3.125
2014	2	2	2	0	2	2.6	2.1	3.05	4	4.1	4.35	2.0625
2014	2	1	2	0	3	2.55	3.85	3.25	3.75	3.25	3.5	1.9375
2014	2	2	2	0	3	2.6	2.57895	2.35	3.95	3.2	4	3.5625
2014	2	1	2	0	2	3.35	2.35	2.95	2.6	2.85	3.5	1.4375
2014	1	1	2	0	1	3	2.2	3	4.15789	3.35	2.8	2.125
2014	1	1	2	0	2	3	1.84211	3.2	2.6	3.4	4.1	1.3125
2014	1	2	2	0	1	2.4	3.05	3.3	3.85	3.8	4.25	1.875
2014	1	2	2	0	1	3.05	3.7	3	2.65	2.85	3.55	2.875
2014	1	1	2	0	1	2.1	3.5	2.55	2.55	2.25	2.9	2.6875
2014	1	1	2	0	1	3.15	2.8	3.65	1.7	2.95	4.1	1.875
2014	1	1	2	0	1	2.5	3.35	3.4	3.55	3.15	4.4	3.375
2014	1	1	2	0	1	3	2.3	2.9	3.65	3.15	3.15	2.375
2014	1	1	2	0	1	2.75	3	2.9	3.35	3.3	4.25	2.375
2014	2	1	2	0	2	3	2.5	2.9	3.7	3.95	3.95	1.5625
2014	2	1	2	0	2	2.5	3.75	2.45	3.75	2.65	2.85	2.375
2014	1	2	2	0	2	3	3.95	3.15	3.35	3.05	4.4	2.625
2014	2	2	2	0	2	2.4	1.6	2.75	4.6	4.45	4.45	2.5625
2014	2	2	2	0	2	2.85	2.3	2.84211	2.85	4.35	3.4	2.9375
2014	1	2	2	0	2	2.35	3.35	3.35	3.65	4.05	3.7	1.9375
2014	2	2	2	0	1	2.35	1.8	2.85	4.1	3.7	4.22222	3.875
2014	1	2	2	0	2	3.3	3.05	3	3.2	3.1	3.4	2.6875
2014	2	2	2	0	2	3.6	1.95	2.85	3.89474	3.9	4.10526	2.66667
2014	2	2	2	0	2	2.4	2	2.9	4	3.95	4.65	3.8125
2014	2	1	2	0	2	2.2	3.75	2.8	3.75	3.4	4.05	2.5
2014	2	1	2	0	4	2.4	2.75	3	4	3.85	3.9	3
2014	2	1	2	0	2	2.75	2.15	3.35	3.75	3.85	4.15	3.4375
2014	2	1	2	0	2	1.95	3.35	2.95	3.85	3.5	3.2	1.5
2014	1	2	2	0	2	2.45	2.2	3.25	3.95	3.9	3.95	2.5625
2014	2	2	2	0	2	2.25	2.5	3.6	4.65	3.85	4.05	2.5
2014	1	1	2	0	2	2.75	3	2.8	4.35	3.35	3.85	3.375
2014	2	1	2	0	2	3.45	3.45	2.95	3.2	2.8	3.2	3.0625
2014	2	1	2	0	1	2.31579	2.1	3.05	3.95	3.75	3.9	1.5625
2014	2	2	2	0	2	3.15789	2.85	3.05	3.6	4.2	4.15	3.75
2014	1	2	2	0	1	3.75	1.65	2.7	4.2	4.35	4.3	2.0625
2014	1	2	2	0	1	3.9	1.75	2.8	3.65	3.9	3.7	2.4375
2014	2	1	2	0	1	2.15	3.65	3.1	2.7	3.5	3.7	1.5
2014	1	1	2	0	1	2.68421	2.05	3.5	2.75	3.8	3.9	1.5625
2014	1	1	2	0	1	2.05	2.75	3.2	3.25	4.45	3.8	1.75
2014	2	1	2	0	1	2.6	3.2	2.7	3.95	3.05	4.15	3.75
2014	1	1	2	0	1	3.05	2.3	2.95	4.15789	3.75	3.35	3.0625
2014	2	2	2	0	1	3.2	2	2.75	3.9	3.3	3.8	3.25
2014	1	1	2	0	1	2.7	3.2	2.9	3.25	2.8	3.75	2.9375
2014	1	1	2	0	3	1.95	3.2	3.05	4.55	4.05556	4.31579	3
2014	1	2	2	0	1	3	2.5	2.55	4.2	4.15	3.65	4.1875
2014	2	1	2	0	1	2.5	3.55	3	3.95	3.7	4.25	3
2014	2	1	2	0	1	2.6	1.78947	3	4.05	4.6	4.1	2.4375
2014	1	2	2	0	3	2.6	3.3	3.1	3.25	3.65	3.2	2.4375
2014	2	2	2	0	1	2.45	2.75	2.95	3.95	4.45	3.95	2.5
2014	2	2	2	0	1	3.7	2.7	2.8	3.6	2.35	3.6	3.125
2014	2	1	2	0	1	2.85	1.7	3.3	3.8	4.35	4.25	3.3125
2014	2	1	2	0	1	1.9	1.55	3.65	4.25	4.55	4.75	2.25
2014	1	2	2	0	1	2.9	1.95	3	3.7	3.55	4.05	2.625
2014	2	1	2	0	1	3.05	2.1	3.2	3.3	3.9	4.5	2.93333
2014	2	1	2	0	1	2.6	1.95	3.1	4.25	4.35	4.65	4.1875
2014	2	1	2	0	1	2.6	2.35	3	3.2	4.05	3.8	3.375
2014	2	2	2	0	1	2.7	1.8	2.95	4.35	4.15	4.3	3.26667
2014	1	2	2	0	1	3.05263	1.55	3.05	3.5	3.45	4.2	3.5
2014	2	1	2	0	1	2.35	3.35	3.05	3.75	2.8	3.4	2.25
2014	2	1	2	0	1	2	3.55	3.2	3.3	2.5	3.55	2
2014	1	2	2	0	1	2.65	3.45	2.65	3.8	3.2	4.2	3.0625
2014	2	2	2	0	1	2.75	3.45	3.05	3.35	3.8	3.95	2.0625
2014	2	1	2	0	1	2.95	2.2	3.3	2.75	3.6	4.3	2.6875
2014	1	2	2	0	1	2.25	2.9	2.8	4.05	3.75	4.2	3.375
2014	2	2	2	0	1	2.15	3.15	2.65	4.21053	3.55	3.65	2.8125
2014	1	1	2	0	1	2.65	1.55	3.2	3.95	4.2	3.9	3.4375
2014	1	1	2	0	1	2.8	2.47368	2.7	3.75	3.7	4.10526	2.625
2014	1	1	2	0	1	2	2.05	3.05	4	4.35	4.15	3.5
2014	2	2	2	0	1	2.25	4.15	2.9	3.6	3.1	3.35	2.25
2014	2	1	2	0	1	3.1	2.75	3	2.55	3.15	3.15	1.5
2014	1	1	2	0	1	2.55	3.1	3.15	3.05	3.1	3.85	3.3125
2014	2	2	2	0	1	2.7	1.8	2.9	3.95	4.45	4.3	3.6875
2014	1	1	2	0	1	2.5	2.35	2.95	3.55	3.7	4.25	2.9375
2015	1	1	2	0	1	2.85	2.95	3.35	2.85	4.2	4.55	3.5
2015	2	1	2	0	1	3.3	2	2.95	3.65	3.6	4.2	2.0625
2015	2	1	2	0	1	2.05	3.4	3.25	3.15	3.4	3.65	1.75
2015	2	1	2	0	1	3.55	2.25	2.7	4.5	3.85	3.3	2.375
2015	1	2	2	0	1	2.35	2.5	3.3	3.65	3.7	4.15	2.5
2015	1	2	2	0	1	2.25	3	3	3.5	4	4.3	3.4375
2015	2	1	2	0	1	2.95	1.85	3.2	4.05	4.4	4.25	4.75
2015	1	2	2	0	1	2.7	2	2.75	4.55	4.45	4.1	4.0625
2015	1	1	2	0	1	3.15	1.68421	3	4.05	4.25	4.05	2.375
2015	2	1	2	0	1	2.55	1.9	3.1	4.45	4.75	4.05	2.5
2015	2	1	2	0	1	3.3	2	3.1	2.55	2.85	3.35	1.5625
2015	2	2	2	0	1	2.5	3.45	3.05	3.75	4.3	3.6	2.375
2015	2	2	2	0	1	3.05	3.25	3.15	3.55	3.95	4.05	4
2015	2	1	2	0	1	2.8	3.85	2.85	3.36842	3.26316	3.73684	2.75
2015	2	1	2	0	1	2.94737	2.75	3.3	3.85	3.8	3.95	2.5625
2015	2	2	2	0	1	2.25	2.85	3.4	4.55	4.2	4.57895	2.0625
2015	2	1	2	0	1	2.4	3.75	2.95	3.05	2.6	2.65	2.875
2015	2	1	2	0	1	2.85	2.3	3.4	3.95	4	3.65	1.25
2015	1	2	2	0	1	2.65	2.1	3.2	3.9	3.7	3.8	2.625
2015	2	1	2	0	1	3.4	3.15	2.9	3.95	3.95	3.1	2
2015	2	1	2	0	1	2.42105	2	3.05	3.65	4.25	4.2	2.25
2015	1	2	2	0	1	3.2	3.25	3.2	3.9	3.2	2.95	2.375
2015	1	2	2	0	1	3.35	3.1	3	2.15	2.95	4.15	2.375
2015	1	1	2	0	1	2.5	2.85	2.9	4.05	3.65	3.2	2.4375
2015	1	1	2	0	1	3	2.9	2.55	3.15789	3.2	3.4	2.25
2015	2	1	2	0	1	2.3	3.15789	3.05	4.05	3.3	3.45	1.5625
2015	1	2	2	0	1	2.55	1.2	3.15	4.95	4.75	4.6	2.3125
2015	2	2	2	0	1	2.35	3.65	2.8	3.85	3.15	4.2	3.375
2015	2	1	2	0	1	3.65	1.7	3.15	3.2	3.95	4.65	3.375
2015	2	1	2	0	1	2.7	2.65	2.78947	4.45	3.05	3.31579	1.57143
2015	2	1	2	0	1	2.95	3.45	3.05	4.05	3.3	3.45	1.6875
2015	2	1	2	0	1	2.1	3.1	3.1	4.65	4.2	3.9	2.8125
2015	2	2	2	0	1	2.2	3.25	3.1	4.05	3.55	4.35	3.125
2015	2	1	2	0	1	2.95	1.95	3.05	4.3	3.7	3.55	2.4375
2015	2	2	2	0	1	2.35	3.25	2.7	4.05	3.8	4.05	4
2015	1	1	2	0	1	3.25	1.6	2.95	4.3	3.9	4.15	2.75
2015	2	2	2	0	1	2.85	3	2.75	3.95	4.15	4.25	3.5
2015	2	1	2	0	1	3.25	2.85	3	4	3.25	3.8	3.0625
2015	2	2	2	0	1	2.95	3.3	2.9	4	4.05	4.1	2.375
2015	1	2	2	0	1	2.3	2.15	3.55	4.4	4.65	4.85	2.1875
2015	1	1	2	0	1	2.5	2.55	3.1	3.55	3.5	4.05	2.8125
2015	1	1	2	0	1	2.75	2.9	2.9	3.95	3.7	4.1	3
2015	2	2	2	0	1	2.7	3.5	3.5	3.45	4.4	3.85	3.3125
2015	2	1	2	0	1	2.45	3.85	2.9	2.2	2.05	3.05263	3
2015	1	1	2	0	1	2.9	2.1	2.85	3.9	3.6	3.9	3
2015	1	1	2	0	1	3.15	2.05	3.35	4.5	3.65	3.85	3.6875
2015	1	2	2	0	1	2.8	3.7	2.8	4.05	3.2	4.75	2.8125
2015	1	1	2	0	1	2.7	1.75	3.1	3.9	4	4.6	3.625
2015	1	1	2	0	1	3.3	3.25	2.7	3.9	2.95	3.95	3.75
2015	1	1	2	0	1	3.1	1.8	3.26316	3.45	4.1	4.45	3.75
2015	1	1	2	0	1	3.15	2.8	3.1	3.55	3.65	3.35	3.3125
2015	1	1	2	0	1	2.8	2.1	3.3	3.7	3.85	4.05	2.8125
2015	1	2	2	0	1	2.25	3.5	3.1	3.75	3.85	3.7	2.4375
2015	1	2	2	0	1	2.5	3.3	3	3.7	3.31579	3.85	2.375
2015	1	2	2	0	1	2.65	4.1	3.15	2.3	2.5	3.63158	2.9375
2015	2	1	2	0	1	2.65	3.45	2.95	2.65	3	3.4	1.75
2015	2	2	2	0	1	3.5	3.05	3	4	3.4	3.9	2.875
2015	2	2	2	0	1	2.15	3.15	3.25	4.65	4.5	4.1	3.0625
2015	1	2	2	0	1	2.9	2.95	2.9	3.5	3.6	3.95	3.125
2015	2	1	2	0	1	2.75	2.3	3	4.36842	3.8	4.3	2.25
2015	2	1	2	0	1	3.2	3.1	2.6	4.05	4	4.3	4.0625
2015	1	2	2	0	1	1.95	2.4	3.35	4.55	4.4	4.15	2.25
2015	2	1	2	0	1	2.4	1.95	3.25	4.05	3.85	4.3	3.1875
2015	2	2	2	0	1	3.6	3.4	2.35	3.89474	4.3	4.8	4.1875
2015	2	2	2	0	1	2.31579	2.8	2.5	4.2	3.4	3.95	3.8125
2015	2	1	2	0	1	3.2	2.7	2.9	3.1	3.2	3.25	2.4375
2015	2	1	2	0	1	3.25	1.5	2.95	4.1	3.2	4.7	3.5
2015	2	1	2	0	1	2.7	2.35	3.25	4.15	4.15	4.3	3.0625
2015	2	2	2	0	1	3.2	2.1	3.15	4.35	4.15	4.78947	3.4375
2015	2	1	2	0	1	2.85	2.9	3.15	3.35	3.35	4	3
2015	2	2	2	0	1	2.35	4.05	3.1	3	3.5	3.65	1.625
2015	2	2	2	0	1	3.15	2.4	3.5	3.65	4.5	4.65	2
2015	2	1	2	0	1	2.5	1.75	3.2	4.35	3.85	4.55	3.875
2015	2	1	2	0	1	2.8	3.35	3.2	3.55	3.75	3.75	2.13333
2015	2	2	2	0	1	2.3	2.85	3.1	4.05	4.05	4.55	3.9375
2015	2	1	2	0	1	2.85	2.3	2.75	4.35	4.05	3.3	2.5
2015	2	2	2	0	1	2.9	2.75	3	3.73684	4.1	4.3	3.0625
2015	2	2	2	0	1	1.85	3.1	2.9	4.1	4.15	4.8	3.8125
2015	2	2	2	0	1	3.1	2.4	2.95	3.95	4.6	4.75	3.0625
2015	1	1	2	0	1	2.3	2.85	2.95	4.8	4.3	4.3	4
2015	2	2	2	0	1	2.65	2.9	3	3.55	3.55	4.15	3.125
2015	2	2	2	0	1	2.6	3.35	3.4	3.5	4.1	4.55	2.2
2015	1	2	2	0	1	2.3	2.55	3.2	4.7	4.15	4.35	3.875
2015	2	1	2	0	1	2.75	2.75	3.3	3.05	3.15	4.1	3.6875
2015	2	1	2	0	1	3.65	2.75	3.3	3.9	3.3	4.2	2.1875
2015	1	2	2	0	1	2.94444	2.55556	3.10526	3.72222	4.27778	4.11111	2.33333
2015	1	1	2	0	1	3.05	2.8	3.25	4	3.25	4.05	2.9375
2015	2	2	2	0	1	3.3	2.55	3.25	3.8	3.75	4.5	3.3125
2015	1	1	2	0	1	1.75	1.85	3.05	4.75	4.2	4.45	3.875
2015	2	2	2	0	1	2.65	2.85	3.15	4.5	4.05	4.45	4
2015	1	2	2	0	1	2.7	3.6	2.8	3.55	3.1	4.3	3.4375
2015	2	2	2	0	1	2.4	3.85	3.05	3.9	4.5	4.55	3.8125
2015	1	2	2	0	1	2.95	3.45	3.05	3.9	3.4	4.5	2.25
2015	1	1	2	0	1	2.85	2.8	2.7	3.5	3.1	3.75	2.875
2015	1	1	2	0	1	2.45	2.45	3.26316	4.55	3.75	3.75	2.9375
2015	2	1	2	0	1	2.6	2.75	3.05	4.25	3.9	4	1.8125
2015	2	1	2	0	1	2.5	4	3.2	4.15	2.5	4.05	2.5625
2015	2	2	2	0	1	3.15	2.4	3	4.75	3.75	4.1	3.66667
2015	2	1	2	0	1	2.15	2.05	3.25	3.2	4.25	4	2.125
2015	2	2	2	0	1	1.9	3.15	2.95	4.85	4.15	4	2.125
2015	1	1	2	0	1	2.5	3.1	3.5	3.45	3.9	4.25	1.5
2015	1	1	2	0	1	2.55	2.35	2.45	4.75	3.8	2.95	2.875
2015	2	1	2	0	1	2.35	4.1	3	3.55	2.1	4.05	3
2015	1	2	2	0	1	3.75	3.3	2.7	2.1	2.25	3.68421	3.625
2015	1	1	2	0	1	3	1.68421	2.7	4.2	4	4.3	2.875
2015	2	2	2	0	1	3.1	2.85	3.05	3.75	3	4.1	3.5
2015	2	1	2	0	1	3	3	3	3	3	3	3
2015	2	1	2	0	1	2.85	1.9	3	4.55	4.5	4	2.3125
2015	2	2	2	0	1	2.4	3.1	2.95	4.4	3.4	4.4	2.4375
2015	2	1	2	0	1	1.95	2.2	3.7	4.45	4.55	4.15	1.625
2015	1	1	2	0	1	2.65	2.9	3.1	3.8	4.5	4.2	2.4375
2015	1	1	2	0	1	2.95	2.5	2.75	3.15	2.75	4.15	2.1875
2015	2	2	2	0	1	2.55	2.25	2.85	3.75	3.95	3.05	1.875
2015	1	2	2	0	1	2.35	2.2	2.6	4.8	4.65	4.65	3.5
2015	2	2	2	0	1	3.75	2.2	2.85	4.7	3.4	3.35	2
2015	2	2	2	0	1	2.5	3.6	3.15	3.3	3.1	3.75	2.6875
2015	1	2	2	0	1	2.8	2.9	2.6	3.5	2.95	3.8	3.625
2015	2	1	2	0	1	2.55	1.9	3.05	3.85	4.15	4	2.75
2015	1	2	2	0	1	2.65	3.1	3.2	4.25	3.5	4.25	1.625
2015	2	1	2	0	1	2.65	1.3	3.05	4.55	4.9	4.45	2
2015	2	2	2	0	1	2.8	3.05	2.65	4.15	4.3	3.65	3.1875
2015	2	2	2	0	1	2.2	3.15	3.3	3.8	3.5	4.2	1.875
2015	2	2	2	0	1	2.4	2.9	3.45	4.2	4.3	4.45	3.5625
2015	2	2	2	0	1	2.8	1.5	2.85	3.8	4.7	4.8	4.4375
2015	1	2	2	0	1	2.5	2.15	3.2	4.25	4.55	4.7	3.1875
2015	1	2	2	0	1	2.95	2.7	3.1	4.1	3.25	4.6	3.25
2015	2	2	2	0	1	3.1	3.15	2.9	4.2	3.25	3.95	3.4375
2015	2	1	2	0	1	2.85	3.3	3.35	3.4	3.15	4	2.5625
2015	1	2	2	0	1	3.1	3.35	2.8	4.1	3.7	3.75	3.375
2015	1	2	2	0	1	2.65	3.85	3.05	3.15	3.25	3.45	1.9375
2015	2	1	2	0	1	3.3	2.65	3.1	4.35	3.9	3.6	2.8125
2015	1	1	2	0	1	1.7	4.2	3.7	3.3	3.65	4.4	1.25
2015	1	1	2	0	1	2.8	2.5	2.9	3.7	3.4	4.4	2.4375
2015	1	2	2	0	1	2.7	2.15	2.85	4	4.15	4.5	3.9375
2015	2	1	2	0	1	2.95	2	3.25	3.45	3.85	4.25	2.4375
2015	1	1	2	0	1	2.35	3.4	3.25	3.75	2.95	3.55	2.5
2015	1	1	2	0	1	2.05	1.75	3.05	4.95	4.7	4.8	4.3125
2015	1	1	2	0	1	2.9	1.9	2.6	3.8	3.85	3.6	3.3125
2015	1	2	2	0	1	2.85	1.85	2.6	3.65	3.65	3.25	2.6875
2015	1	1	2	0	1	3	3.2	2.75	3.45	3.25	3.7	3.5
2015	1	2	2	0	1	2.65	1.9	3.1	4.65	4.1	2.35	2.5
2015	2	2	2	0	1	2.95	2.5	2.7	4.15	4.05	3.75	1.9375
2015	1	2	2	0	1	2.3	2.21053	2.95	4	3.85	3.8	3.625
2015	1	1	2	0	1	3.05	1.7	3	3.7	4.3	4.35	2.8125
2015	2	2	2	0	1	2.8	4.05	3.25	2.6	2.7	2.95	1.75
2015	2	2	2	0	1	2.75	3.1	2.75	4.15	3.55	3.7	2.1875
2015	2	2	2	0	1	2.8	2.65	3.1	4.65	4.15	3.85	2.875
2015	1	2	2	0	1	2.6	2.5	3.15	4.45	4.15	4.35	2.25
2015	2	2	2	0	1	3.2	2.85	3.05	3.9	3.05	4.4	2.3125
2015	2	2	2	0	1	2.95	3	2.85	4.05	3.9	4.35	3.5
2015	1	1	2	0	1	3.5	1.75	2.7	4.15	3.65	3.26316	2.875
2015	2	2	2	0	1	2.8	1.85	3	4.6	4.25	4.3	2.9375
2015	1	2	2	0	1	2.6	2.15	3.35	3.55	3.15	4.2	1.5
2015	1	2	2	0	1	2.65	3.15	2.75	3.25	3.25	3.8	3.625
2015	1	1	2	0	1	3.6	4.05	2.95	2.4	1.85	3.4	2.5
2015	2	2	2	0	1	2.45	3.35	3.2	3.9	3.6	4.25	3
2015	1	2	2	0	1	1.95	3.8	2.68421	3.65	4.05	4.2	2.0625
2015	1	1	2	0	1	2.75	2.95	2.63158	3.85	3.1	4.3	3.3125
2015	1	2	2	0	1	2.4	1.65	3.45	4.3	4.4	3.9	2.4375
2015	1	2	2	0	1	3.05	1.89474	2.95	3.65	3.6	4.6	3.75
2015	1	1	2	0	1	2.6	2.2	3	4.15	3.63158	4.35	3.375
2015	2	2	2	0	1	2.5	2.4	2.73684	4.9	3.95	3.9	2.13333
2015	2	1	2	0	1	3.4	2.1	3.1	4.25	4	4.6	3.625
2015	2	2	2	0	1	2.65	1.5	2.85	4.75	3.85	4.75	4.0625
2015	1	1	2	0	1	3.2	2.1	2.9	3.95	3.75	4.2	3.5
2015	1	2	2	0	1	2.6	3.95	3	4	3.25	3.84211	2.4375
2015	2	1	2	0	1	2.6	4.05	2.7	3.3	2.25	2.8	3.0625
2015	2	2	2	0	1	2.2	1.84211	3.4	3.75	4.55	4.55	2.875
2015	1	2	2	0	1	2.55	2.6	2.95	3.9	3.85	3.25	3.125
2015	2	1	2	0	1	2.6	2.6	2.9	3.7	3.52632	3.65	3.125
2015	1	2	2	0	1	2.25	3.85	3.15	2.8	3.1	3.05	2.3125
2015	1	2	2	0	1	2.4	4	2.95	3.7	3.2	3.6	2.6875
2015	2	2	2	0	1	2.9	1.6	3	3.65	4.35	4.5	3.375
2015	2	2	2	0	1	1.85	3.4	3.4	3.55	3.8	4.1	2.8125
2015	1	1	2	0	1	3.25	2.05	2.9	3.2	3.65	3.85	3.125
2015	2	1	2	0	1	2.95	1.5	3.1	4.35	4.2	4.3	3.875
2015	1	1	2	0	1	2.15	2.5	2.9	4.2	3.4	4	2.8125
2015	1	1	2	0	1	2.15	2.65	3.3	3.25	3.6	3.55	1.625
2015	2	1	2	0	1	3	2.5	2.9	4.75	3.5	4.05	2.9375
2015	2	2	2	0	1	2.15	3.65	3.15	4.25	3.75	4.5	2.33333
2015	1	2	2	0	1	3.21053	2.85	2.95	3.5	3.05	3.9	3.0625
2015	1	2	2	0	1	2.6	2.75	3.35	3.6	4.05	4.65	3.3125
2015	2	2	2	0	1	2.6	3.55	2.75	3.4	3.35	4.1	3.8125
2015	2	1	2	0	1	2.95	2.6	3.3	4.25	4.6	4.85	2.9375
2015	2	1	2	0	1	2.8	3.2	2.35	3.5	2.95	3.2	3.8125
2015	2	1	2	0	1	2.3	4.05	2.85	3.25	2.6	3.75	2.875
2015	1	1	2	0	1	2.8	2.8	2.75	3.95	3.85	3.7	3.3125
2015	2	1	2	0	1	3.4	1.45	3.3	3.95	4.4	3.8	1.75
2015	2	2	2	0	1	2.55	3.9	3.1	3.35	3.1	3.65	3.5
2015	1	1	2	0	1	3.15	1.3	3.1	4.3	4.8	4.8	3.25
2015	2	1	2	0	1	3.45	2.25	3.1	4.6	4.45	4.25	3.1875
2015	1	2	2	0	1	2.5	3.85	3.05	4.45	4.3	4.5	4.4375
2015	1	1	2	0	1	2.65	3.65	2.75	2.3	3.4	3.1	1.9375
2015	2	2	2	0	1	2.4	3.85	2.75	4.4	2.9	3	1.4375
2015	1	1	2	0	1	2.7	3.7	3.25	3.25	3.15	2.95	2
2015	1	1	2	0	1	2.55	3.55	3.25	3.75	3.1	4.2	3.625
2015	1	1	2	0	1	3	3.5	3.2	3.15	3.3	3.2	1.3125
2015	2	2	2	0	1	3.3	3.3	3.35	3.4	3.9	4.2	2.5625
2015	1	1	2	0	1	2.75	3.31579	2.89474	3	3.75	3.9	3.0625
2015	1	2	2	0	1	2.4	2.9	3.1	3.45	3.3	3.55	2.375
2015	1	2	2	0	1	2.7	2.9	3.6	3.65	3.6	3.85	3.0625
2015	1	1	2	0	1	3.3	3.35	3.55	3.15	3.8	4.2	2.5
2015	1	1	2	0	1	2.05	2.85	2.95	4.15	4	3.6	2.375
2015	2	1	2	0	1	2.73684	3	3.05263	3.84211	3.65	4.05	2.8125
2015	2	1	2	0	1	2.55	2.65	2.85	3.1	3.8	4.4	2.5625
2015	1	1	2	0	1	3	1.75	2.65	4.15	3.6	4.05	2.8125
2015	2	1	2	0	1	3.45	3.2	3.15	3	3.7	2.95	2
2015	1	1	2	0	1	2.45	2.10526	2.9	3.5	4	4.2	2.75
2015	1	1	2	0	1	3.3	2.05	2.8	3.8	4	3.25	2.9375
2015	1	1	2	0	1	3.55	2.3	3.3	3.7	3.9	4.4	2.625
2015	1	1	2	0	1	3.3	2.63158	3.15	2.9	3.6	3.95	1.9375
2015	1	1	2	0	1	2.4	3.9	2.8	3.15	2.7	3.8	2.8125
2015	2	1	2	0	1	3.15	2.95	3	3.15	2.95	3.95	2.4375
2015	1	2	2	0	1	3.25	2.65	2.95	3.1	3.1	3.65	2.5625
2015	1	2	2	0	1	2.9	3.2	3.6	3.95	3.35	4.15	3.6875
2015	2	2	2	0	1	2.85	3.4	3.15	3.73684	3.3	3.6	2.875
2015	1	1	2	0	1	3.05	2.65	2.6	4	3.1	3.75	3.375
2015	1	1	2	0	1	2.4	3.2	3.05	2.6	2.6	3.9	2.0625
2014	2	2	2	1	3	1.6	3.1	2.8	5	4.7	4.05	1.875
2014	2	2	2	1	4	3	2.05	3.2	3.8	4.15	4.1	1.9375
2014	1	2	2	1	4	2.55	3.45	2.7	4	3.5	3.8	2.8125
2014	2	1	2	1	4	2.2	2.95	3.3	3.6	4.1	4.55	3.625
2014	2	2	2	1	4	3.25	3.1	2.85	3.55	3.5	3.95	2.75
2014	1	1	2	1	3	2.5	2.9	3.25	2.55	3.65	3.55	1.5
2014	2	1	2	1	4	2.35	2.55	3.15	4.15	4.6	4.3	1.6875
2014	2	1	2	1	2	3.25	1.85	3.3	4.05	3.05	4.35	2.25
2014	2	1	2	1	3	2.45	2.05	3.1	3.55	3.9	4.5	1.4375
2014	2	2	2	1	3	2.6	2.35	2.8	4.1	4.05263	4.05	2
2014	2	1	2	1	3	2.4	4	2.75	3.1	2.85	4.1	3.75
2014	2	2	2	1	3	3.55	2	3.1	3.75	4.05	4.5	2.75
2014	2	2	2	1	3	2.5	2.35	3.25	3.85	4.5	4.45	3.9375
2014	1	1	2	1	1	3.15	3.3	3.15	2.42105	2.6	3.25	2.06667
2014	1	2	2	1	1	2.3	3.25	3.15	4.35	3.6	3.7	2.5625
2014	2	1	2	1	2	2.4	2.6	2.95	4.75	4.25	4.35	2.3125
2014	2	1	2	1	2	2.55	2.15	3.3	3.35	3.25	3.95	2.4375
2014	2	1	2	1	1	2.45	1.6	3.4	4.35	5	4.75	1.75
2014	2	2	2	1	2	2.9	3.15	3.2	2.75	3.9	4.65	3.8125
2014	2	2	2	1	2	3.1	3.55	3.25	2.6	3.25	4.05	1.3125
2014	2	1	2	1	2	3.21053	2.26316	2.8	3.35	4	3.7	3.5
2014	1	2	2	1	1	2.5	2.6	3.1	3.45	3.5	3.85	3.8125
2014	1	2	2	1	1	2.7	1.65	3.3	4.8	4.65	4.7	1.75
2014	2	1	2	1	1	2.55	2.15	3.05	3.95	4.15	4.35	3.3125
2014	2	1	2	1	1	2.65	2.6	3.1	2.75	2.9	4.25	3.625
2014	1	1	2	1	1	3.45	1.6	3	3.85	3.7	4.2	2.9375
2014	1	2	2	1	1	2.95	2.1	2.75	4.2	3.85	4.2	3
2014	1	1	2	1	1	3	3.05	2.6	3.31579	2.65	2.95	3.6875
2015	1	1	2	1	1	2.85	3.2	2.7	4.2	2.8	3.6	2.875
2015	1	2	2	1	1	3.05	2.95	3.25	4.55	3.95	4.05	2.13333
2015	1	1	2	1	1	1.5	3.5	3.4	3.9	4.2	4.3	2.375
2015	1	2	2	1	1	2.35	3	3.2	3.6	3.85	4.6	3.5625
2015	1	1	2	1	1	3.6	1.7	2.95	4.15	4.3	3.7	3.0625
2015	1	1	2	1	1	2.8	2.2	3.3	3.75	3.52632	3.6	2.3125
2015	1	2	2	1	1	2.85	2.9	3.15	3.65	3.65	3.85	2.75
2015	2	1	2	1	1	3.4	2.4	3.4	4.05	4.45	3.95	2.8125
2015	1	2	2	1	1	2.55	3.9	3.3	3.45	3.7	3.95	3.3125
2015	1	2	2	1	1	3.15	2.35	3.05	3.45	4.25	4.45	3.125
2015	1	2	2	1	1	3.3	2.1	3.2	4.35	4.1	3.8	2.25
2015	2	1	2	1	1	3.5	1.7	3.25	3.8	4.7	4.35	3.5625
2015	2	2	2	1	1	3.05	2.55	3.1	3.8	3.7	4.45	3.5625
2015	2	1	2	1	1	1.85	4.3	2.75	4.1	2.85	3.8	3.875
2015	2	1	2	1	1	2.85	2.15	3.2	2.9	2.55	3.35	2.75
2015	2	2	2	1	1	2.65	3	3.1	4.2	3.8	4.75	3.625
2015	2	2	2	1	1	2.65	2.9	3.1	4.3	4.2	4.55	2.8125
2015	1	1	2	1	1	2.65	3.8	3.1	4.4	3.4	3.4	2.25
2015	2	2	2	1	1	2.9	1.15	2.9	4.2	4.25	4.6	2.66667
2015	2	2	2	1	1	2.1	2.45	3	4.9	3.25	4.5	2.1875
2015	1	1	2	1	1	2.95	2.1	3.25	3.95	4.25	4.65	3.125
2015	1	2	2	1	1	2.4	3.55	3.15	3.6	3.2	4.05	3.3125
2015	2	1	2	1	1	2.25	2.05	3	4.55	4.05	4.2	2.5625
2015	2	1	2	1	1	3.45	2.15	2.85	4.1	3.2	3.95	2.375
2015	2	1	2	1	1	3.45	1.75	3.05	4.4	4.45	3.6	1.875
2015	1	1	2	1	1	3.45	1.95	3.35	3.95	4.1	4.05	1.8125
2015	1	1	2	1	1	3	2	2.9	4.4	4	3.65	2.875
2015	2	2	2	1	1	2.85	2.45	3.25	3.75	4.25	4.8	2.625
2015	1	1	2	1	1	2.75	2.85	3.2	3.4	2.95	4.05	2.5
2014	2	2	1	0	2	2.25	3.65	3.1	4.65	4.3	4.45	1.9375
2014	2	1	1	0	1	3.55	2.35	3.05	3.3	3.9	4.35	3.1875
2014	1	1	1	0	3	1.95	3.55	3.42105	2.8	4.47368	4.5	2.125
2014	1	2	1	0	4	3	2.55	2.95	3.45	3.95	4.25	3.8125
2014	1	1	1	0	3	3.4	4.1	3	2.85	2.4	3.4	2.3125
2014	2	1	1	0	2	2.52632	4.1	3.2	2.7	2.57895	3.9	2.125
2014	2	1	1	0	2	3.2	1.85	3.45	3.55	4.65	4.1	1.6
2014	2	2	1	0	1	2.55	3.55	3.2	3.6	2.75	4.25	3
2014	2	2	1	0	4	2.63158	2.10526	2.75	4.05	3.75	3.9	3.1875
2014	2	2	1	0	4	3.5	3.05	3.3	2.65	3.7	3.8	2.4375
2014	2	2	1	0	4	2.55	3.1	3.15	3.6	3.3	4	2.4375
2014	2	1	1	0	4	2.85	3.7	3.15	3.45	2.85	3.85	1.75
2014	2	1	1	0	3	3.65	1.9	3.45	4.65	4.15	4.15	2.125
2014	2	1	1	0	3	2.75	1.95	2.9	4	3.95	4.25	2.8125
2014	2	1	1	0	4	3	2.9	3.2	3.75	3.75	3.05	1.4375
2014	2	2	1	0	1	2.3	2.8	3	3.55	3.15	3.8	4
2014	1	2	1	0	4	2.5	3.95	2.94737	3	2.4	4.15	3.25
2014	1	2	1	0	1	2.7	2.75	3.3	3.05	4.2	3.9	1.4375
2014	1	2	1	0	2	2.55	2.05263	3.05	4.2	3.35	3.7	3
2014	1	2	1	0	3	2	2.1	3.42105	3.55	4	4.4	3.4
2014	1	2	1	0	4	3.9	3.3	3.2	3.4	1.9	3.25	2.8125
2014	1	1	1	0	4	3.05	3.05	3.4	3.75	4	4.25	1.6875
2014	1	1	1	0	4	2.68421	2.2	3.05	3.5	3.45	3.55	2.75
2014	1	2	1	0	3	2.5	2.9	2.85	4.35	4.35	4.6	3.75
2014	1	2	1	0	4	2.6	3.1	3.55	3.25	2.85	3.65	2.1875
2014	1	2	1	0	4	3.05	3	3.25	4.21053	3.55	4.1	1.6875
2014	1	2	1	0	4	2.4	3.5	2.9	3.35	2.9	3.75	3.125
2014	1	2	1	0	4	2.45	3.7	3.4	2.85	2.8	4.35	2
2014	1	2	1	0	4	3	1.75	2.95	4.4	4	4.55	3.6875
2014	1	1	1	0	4	2.55	3.7	3.05	3.25	3	3.8	3.1875
2014	1	1	1	0	4	3	2.35	3.42105	3.6	3.85	4.2	1.5625
2014	1	2	1	0	4	2.75	4.1	3.1	4.1	3.55	4.2	1.8125
2014	1	2	1	0	4	2.25	3.35	3.45	3.5	3.85	4.3	3.25
2014	1	2	1	0	4	2.35	3.45	3.4	3.26316	3.1	3.95	2.4375
2014	2	2	1	0	2	3.05	2.6	2.95	3.75	3.55	3.9	2.875
2014	1	2	1	0	2	2.3	3.1	3.55	3.9	4.1	4.5	2.125
2014	1	1	1	0	3	2.9	1.75	3.25	4	4.45	3.95	1.5
2014	1	1	1	0	3	3	1.95	2.9	3.7	4.25	4.5	2.875
2014	1	1	1	0	3	1.6	4.2	3.15	2.85	2.95	3.7	2.375
2014	1	1	1	0	1	2.52632	2.5	3.15	3.6	3.75	4.3	1.9375
2014	1	2	1	0	3	1.95	3.2	3.05	3.57895	3.6	2.9	1.8125
2014	1	2	1	0	3	2.15	4.3	3.2	3.35	2.85	4.15	2
2014	1	2	1	0	3	3.05	3.3	3.3	3.1	3.1	4	2.125
2014	1	2	1	0	3	2.85	2.6	3.15	3.8	4.3	4.6	2.5625
2014	1	2	1	0	3	3.5	2.45	2.85	3.6	3.75	4.45	3.125
2014	1	2	1	0	3	3.05263	3.4	2.6	3.95	2.9	4.05	4.0625
2014	1	2	1	0	1	2	3.35	3.35	3.8	3.9	4.35	1.875
2014	1	1	1	0	3	3.25	3.45	2.95	2.55	3	4.05	2.5
2014	1	1	1	0	3	2.1	3.55	2.9	3.68421	2.8	3.22222	3.375
2014	1	2	1	0	3	2.6	3.9	3.35	2.8	3.3	4.05	1.5
2014	1	2	1	0	3	2.8	2.55	3.15	4.1	4.1	4.3	3.3125
2014	1	1	1	0	3	2.55	3.25	3.3	2.75	3.25	3.5	1.8125
2014	1	2	1	0	3	2.9	3.5	3.25	3	3.5	4.6	2.25
2014	1	2	1	0	3	2.35	2.85	3.2	3.35	3.25	2.78947	1.75
2014	2	2	1	0	4	2.75	3.15	3.1	4.25	3.9	4.05	1.5625
2014	1	1	1	0	4	2.75	2.4	3.35	3.45	3.65	4.2	2.5
2014	1	1	1	0	3	3.2	3.3	3.15	3.25	4.2	4.25	2
2014	2	1	1	0	4	3.1	3.75	2.8	3	2.9	3.3	1.6875
2014	1	1	1	0	4	3	2.2	2.85	4.21053	3.8	4.65	3.125
2014	2	2	1	0	4	3.4	3.65	3.45	2.75	3.25	4	1.4375
2014	2	1	1	0	4	3.1	4.15	2.75	4.05	3.45	2.75	3.375
2014	1	1	1	0	2	2.65	1.75	3	3.8	4.2	3.7	2.6875
2014	1	1	1	0	2	2.25	2.7	2.9	3.9	3.05	4	3.0625
2014	1	1	1	0	2	2.55	3.15	3.65	3.95	3.94737	4.15	1.3125
2014	1	1	1	0	2	3.05	3.1	3.15	3.1	3.1	3.8	3.5
2014	1	2	1	0	2	3	3.3	3.45	2.95	3	4.05	1.875
2014	1	2	1	0	1	2.55	2.55	3.3	3.7	3.75	4.2	1.4375
2014	1	2	1	0	2	3.35	3.75	3.15	3.05	2.45	3.15	2.75
2014	1	1	1	0	2	3.2	3.3	3.05	3.25	3	3.52632	2.53333
2014	1	1	1	0	2	2.7	2.15	3.15	3.5	3.75	4.05	2.25
2014	1	2	1	0	2	3	1.75	2.95	3.21053	3.95	4.3	3
2014	1	2	1	0	1	2.6	2.35	3.1	4.4	3.8	4.05	2.75
2014	1	2	1	0	1	3.88889	3.1	2.84211	3.85	3.05	4.2	4.5
2014	1	2	1	0	1	3.05	2.3	3	4	3.6	3.9	3.375
2014	1	2	1	0	1	2.75	3.6	3.2	3.6	3.3	3.95	2.75
2014	1	1	1	0	1	2.85	1.95	3.3	3.85	4.05	4.9	3.1875
2014	1	2	1	0	1	2.1	4.1	3.05	3.9	3.45	4	3.13333
2014	1	2	1	0	1	3.05	1.55	3.1	4.2	4.45	4.5	2.0625
2014	1	1	1	0	1	2.35	1.9	3.2	3.9	4	4.25	2.625
2014	1	1	1	0	1	2.9	3.55	3.35	2.15	2.3	3.1	2.1875
2014	1	2	1	0	1	3	2.55	2.95	3.05	3.5	3.6	2.75
2014	1	1	1	0	1	2.3	3.35	3.55	3.4	3.35	3.45	1.625
2014	1	1	1	0	1	2.85	2.25	3.15	3.5	4.05	3.8	2.875
2014	1	2	1	0	1	2.8	3.05	3.15	3.1	4.2	4.1	2.4375
2014	1	2	1	0	1	2.47368	3.15	3	3.15789	3.1	3.75	3.125
2014	1	2	1	0	1	3.47368	3	3.1	3.3	3.3	4.35	3.25
2014	1	2	1	0	1	3.15	1.55	3.1	3.75	3.8	4.85	3
2014	1	1	1	0	1	2.45	3.05	3.3	2.7	3.5	3.8	2.75
2014	1	1	1	0	1	2.55	3.35	3.6	3.65	3.6	4.15	1.1875
2014	1	2	1	0	1	2.8	2.2	3.3	4	4.05	4.2	1.4375
2014	1	1	1	0	1	2.5	3.1	3.45	4	3.65	3.55	2.375
2014	1	1	1	0	1	2.75	2.1	3.15	3.75	4	3.55	2.0625
2014	1	2	1	0	1	2.8	3.15	2.9	3.45	3.85	3.8	2.5625
2014	1	2	1	0	1	2.8	1.9	3	4.5	3.8	4.65	4.25
2014	1	2	1	0	1	2.15	3.8	3.4	2.95	3.55	3.65	3
2014	1	1	1	0	1	2.85	2.5	2.95	3.95	3.3	3.5	2.0625
2014	2	2	1	0	2	2	3.9	2.6	4.75	2.7	4.35	4
2014	1	2	1	0	2	2.35	2.94737	3.3	3.63158	4.15	4.31579	1.375
2014	1	1	1	0	2	2.7	2.25	3.2	4	3.75	4.05263	2.0625
2014	2	1	1	0	2	4.1	1.8	2.9	3.95	3.63158	3.7	2.8125
2014	2	1	1	0	2	2.6	2.45	3.15	2.85	3.65	3.85	1.8125
2014	1	1	1	0	2	2.35	3.05	3.25	3.65	3.3	3.75	1.875
2014	2	1	1	0	2	2.7	2.9	3.25	3.9	3.8	3.9	1.6875
2014	1	2	1	0	2	2.94737	3.25	3.21053	3.41176	3.25	3.8	2.625
2014	1	1	1	0	2	2.35	3	3.2	3.15	3.2	3.9	3.1875
2014	2	2	1	0	2	2.4	3.25	3.2	3.5	3.25	3.75	3.6875
2014	1	2	1	0	1	2.85	2.9	2.94737	3.65	4.35	3.2	1.25
2014	2	1	1	0	1	2.5	1.8	3.25	3.4	4.75	4.7	2.1875
2014	2	1	1	0	1	2.55	2.55	3.55	3.75	3.35	3.75	1.8125
2014	1	1	1	0	1	2.65	2.95	3.35	3.25	3.2	3.85	1.875
2014	1	2	1	0	1	2	2.05	3.3	4.75	4.2	4.9	4.4375
2014	1	1	1	0	1	1.95	3.45	3.3	3.25	3.45	4	2.6875
2014	1	2	1	0	1	2.75	3.85	3.1	3.57895	3.15	3.55	2.375
2014	1	2	1	0	1	2.45	2.85	3	3.45	3.7	3.65	2
2015	2	1	1	0	1	2.8	2.85	3	2.95	3.4	2.9	1.8125
2015	1	1	1	0	1	3	2.5	3.25	4.75	4.5	4.25	2.5625
2015	1	1	1	0	1	2.95	2.8	3.05	3.65	3.2	3.68421	2.9375
2015	1	1	1	0	1	2.85	2.8	2.65	4.35	3.15	3.45	3.25
2015	1	1	1	0	1	3	2.05	3	3.65	4.15	4.15	3.25
2015	1	1	1	0	1	3.55	3	2.6	2.9	2.7	3.8	3.5625
2015	1	1	1	0	1	2.05	3.2	2.75	3.65	3.45	4.25	2.93333
2015	2	2	1	0	1	2.85	2.45	3	4.1	4.35	3.95	2.3125
2015	2	1	1	0	1	3.35	2.1	3	2.6	2.7	4.6	3.6875
2015	2	1	1	0	1	2.6	2.1	2.8	4.25	3.15	3.65	1.5
2015	2	1	1	0	1	2.8	2.8	3.2	3.45	3.1	3.6	2.5625
2015	1	2	1	0	1	2	3	3.2	3.7	4.2	4.35	1.6875
2015	2	1	1	0	1	3	2.1	3.15	3.55	3.85	4.1	1.6875
2015	1	2	1	0	1	1.55	3.6	3.5	4.65	4.55	4.4	2.125
2015	1	2	1	0	1	2.6	3.4	2.9	3.85	2.95	3.85	2.5
2015	1	1	1	0	1	2.95	2.7	3.05	3.3	3.3	3.35	3.1875
2015	1	2	1	0	1	3.15	2.1	3.15	4.47368	4.05263	4.35	2.8125
2015	1	1	1	0	1	3	1.8	3.25	4.6	3.95	3.75	1.8125
2015	1	2	1	0	1	2.2	4.2	3.15	3.45	2.5	4.3	2.75
2015	1	2	1	0	1	2.3	3.25	3.45	4	4.25	3.68421	1.5
2015	2	1	1	0	1	2.95	3.05	3.1	3.35	3.6	3.55	1.9375
2015	2	2	1	0	1	2.7	2.95	3	4.1	4.55	4.3	3.0625
2015	2	2	1	0	1	2.63158	1.9	3.55	4.05	4.7	4.45	3.8125
2015	2	1	1	0	1	2.85	3.05	3.35	3.05	3.7	4.1	2.8125
2015	1	1	1	0	1	2.8	2.4	3.25	3.65	3.8	4.15	1.5625
2015	2	2	1	0	1	3.3	2.3	3.05	4.10526	4.2	4.15	1.9375
2015	2	1	1	0	1	2.65	3.95	4	4.1	4.05	4.3	2.625
2015	2	2	1	0	1	2.9	1.8	3.5	3.75	3.85	4.6	3
2015	2	2	1	0	1	2.9	4.45	2.95	3.25	2.94737	4.2	2.8125
2015	2	1	1	0	1	2.8	2.1	3.2	4.25	3.95	4	2.1875
2015	2	2	1	0	1	3.15	3.05	3.05	3.4	3.6	4.1	2.5625
2015	2	2	1	0	1	2.85	3.05	3.35	3.15	3.5	3.95	2.25
2015	2	1	1	0	1	2.55	2.6	3.2	3.8	3.8	3.95	2.125
2015	2	1	1	0	1	2.7	3.1	3.3	3.55	2.95	4.25	1.25
2015	2	1	1	0	1	2.6	2.7	3.2	3.9	3.8	4.1	2.125
2015	2	1	1	0	1	3.4	2	3.4	4.3	4.3	4.4	2.3125
2015	2	2	1	0	1	2.6	3.8	3.1	3.5	3.4	3.95	2.8125
2015	2	1	1	0	1	3.1	2.5	3.2	2.9	3.25	3.5	1.625
2015	1	2	1	0	1	3.1	1.75	2.95	3.7	4.3	4.6	2.8125
2015	1	1	1	0	1	2.9	3.05	2.85	4.1	3.45	4.1	2.6875
2015	1	1	1	0	1	3	1.3	3.3	3.6	4	3.9	2.125
2015	1	2	1	0	1	2.45	3	3.1	4.1	4.25	3.35	3.0625
2015	1	1	1	0	1	2.7	3.2	3.25	4.05	4	4.45	1.9375
2015	1	1	1	0	1	2.65	2.05	3.2	4.2	4.6	3.85	1.8125
2015	2	1	1	0	1	3.2	4.35	2.85	3.55	2.6	3.4	2.9375
2015	1	2	1	0	1	2.8	3.65	3.5	3.2	3.05	3.85	2.5
2015	1	1	1	0	1	2.9	2.45	2.85	3.9	3.05	3.95	3.125
2015	1	2	1	0	1	3.3	3.1	3	3.75	4.7	4.6	3.375
2015	1	1	1	0	1	2.55	3.2	3.1	3.6	3.75	4.1	2.4375
2015	1	2	1	0	1	2.4	2.75	3.1	4.85	4.5	4.7	2.75
2015	1	1	1	0	1	3.2	2.05	3.1	4.25	4.3	4.3	2.6875
2015	1	1	1	0	1	2.9	2.95	2.89474	3.25	2.95	3.75	1.5
2015	1	1	1	0	1	3.2	2.1	3.25	3.8	3.8	3.7	1.875
2015	1	1	1	0	1	3.25	2.3	2.9	3.8	3.65	4.1	2.75
2015	1	2	1	0	1	3.35	2.25	3.15	3.95	4.4	3.9	1.75
2015	1	1	1	0	1	2.2	4.25	3.3	2.85	3.25	3.7	1.4375
2015	1	1	1	0	1	2.8	2.75	2.8	3.7	3.9	4.1	2.0625
2015	1	1	1	0	1	2.55	3.2	3.1	3.45	3.95	4.5	1.9375
2015	1	1	1	0	1	2.15	3.55	3.1	4.2	3.05263	4.5	2.25
2015	1	2	1	0	1	2.4	3.95	3.05	4.15	2.95	4.15	3.4375
2015	1	1	1	0	1	4.1	1.65	3.2	2.45	2.75	3.65	3.375
2015	1	2	1	0	1	2.05	3.4	3	3.8	3.35	3.9	2.125
2015	1	2	1	0	1	2.75	2.9	2.75	4.26316	3.75	4.65	4
2015	1	1	1	0	1	2.45	3.3	2.5	4.35	3.8	4.5	3.1875
2015	1	2	1	0	1	2.6	3.15	3.05	4.05	3.6	4.25	2.9375
2015	1	2	1	0	1	2.45	3.6	2.75	3.5	3.26316	3.65	2.8125
2015	1	2	1	0	1	2.45	3.05	3.05	3.35	3.4	4.05	2.5
2015	1	1	1	0	1	2.15	3.35	3.25	3.45	3.6	4.55	1.9375
2015	1	2	1	0	1	2.9	3.5	3.35	3.45	2.85	3.85	1.9375
2015	2	1	1	0	1	3.3	2.5	3.25	3.6	3.7	4	2.3125
2015	1	2	1	0	1	2.6	4.15	3.3	3.9	2.8	3.95	2.3125
2015	1	1	1	0	1	2.4	1.95	2.45	3.6	3.9	4.25	3.375
2015	1	1	1	0	1	3.1	2.15	3.2	3.95	4.2	4.6	1.3125
2015	1	2	1	0	1	2.8	3.6	3.05	4.55	3.65	4.5	2.75
2015	1	2	1	0	1	2.4	3.05	3.1	3.55	3.65	3.9	2.25
2015	1	1	1	0	1	2.1	3.5	2.95	4	3.85	3.9	1.75
2015	1	1	1	0	1	2.3	2.9	3.15	3.89474	3.3	4.36842	2.1875
2015	1	2	1	0	1	2.84211	2.6	3.2	3.55	3.4	3.45	2.4375
2015	1	1	1	0	1	3	3.1	2.9	3.65	3.65	4.25	3
2015	1	2	1	0	1	2.1	3.75	2.95	4.25	3.55	4.25	2.5
2015	1	1	1	0	1	2.5	2.5	3.05	4.1	3.65	4	1.375
2015	1	1	1	0	1	2.55	2.75	3.4	3.6	3.8	4.25	2.25
2015	1	1	1	0	1	2.85	2.25	3.25	4.35	3.9	4.1	3.1875
2015	1	2	1	0	1	2.6	3.05	3.15	3.85	3.95	3.9	1.9375
2015	1	1	1	0	1	3.1	2.35	3	3.1	2.8	4	3.8125
2015	1	2	1	0	1	4.10526	1.75	3.05263	4.05	3.8	4.25	3.8125
2015	1	1	1	0	1	2.9	2.6	2.85	2.9	3.2	3.05	2.25
2015	1	1	1	0	1	2.1	2.5	3.1	4.45	4.05	4.5	3.0625
2015	1	1	1	0	1	2.6	1.35	2.85	4.45	4.75	4.9	3.25
2015	1	2	1	0	1	2.25	3.1	2.65	4.7	4	4.5	3.125
2015	1	1	1	0	1	2.55	2.7	3.3	3.8	3.95	3.7	2.4375
2015	2	2	1	0	1	2.05	3.05	2.8	4.7	3.3	3.89474	2.75
2015	2	1	1	0	1	2.4	3.85	3.1	3.15	3.05	3.55	2.3125
2015	1	1	1	0	1	2.15	2.9	3.4	2.85	3.3	3.85	1.375
2015	1	1	1	0	1	3.05	2.73684	3	4.21053	3.6	4.2	3.25
2015	2	1	1	0	1	3.2	2.75	2.45	3.85	2.4	3.4	3.5625
2015	1	2	1	0	1	2.6	1.95	3.2	4.65	4.65	4.75	2.125
2015	1	1	1	0	1	2.35	2.85	3.2	2.8	3.85	4.15	2.3125
2015	1	1	1	0	1	2.9	3.55	2.6	4.31579	3.9	4.3	3.5
2015	1	2	1	0	1	2.45	3.75	3.35	4.3	3.8	4.2	2.75
2015	2	1	1	0	1	2.75	2.15	2.95	3.4	3.6	3.75	2.3125
2015	2	1	1	0	1	3.25	3.05	2.85	3.65	3.05	3.25	3.75
2015	1	2	1	0	1	3.05	3.15	2.8	3.4	3.5	3.8	1.875
2015	2	2	1	0	1	3.05	3.95	3.3	3.25	3	4.15	1.9375
2015	1	2	1	0	1	2.95	1.15	2.75	4.85	4.15	4.4	3.8125
2015	1	1	1	0	1	2.55	2.85	3.1	3.8	3.5	3.95	2.6875
2015	2	1	1	0	1	2.95	3.15	2.8	3.95	4.3	4.05	1.9375
2015	1	1	1	0	1	3.31579	3.25	3.3	3.25	2.75	4.1	1.75
2015	2	1	1	0	1	2.8	3.55	2.85	4.25	3.2	4.15	3.66667
2015	2	1	1	0	1	3.4	2.25	3.25	3.65	3.95	3.8	2.375
2015	1	1	1	0	1	2.6	3.1	3.3	2.8	2.75	4.2	2.75
2015	1	1	1	0	1	3.05	2.1	3.05	3.25	3.9	3.85	2.625
2015	1	1	1	0	1	2.7	2.15	2.95	3.9	4	4	2.3125
2015	1	1	1	0	1	2.5	2.45	3	3.75	3.8	4.55	3.625
2015	1	2	1	0	1	2.75	3.2	2.95	3.6	2.6	4.4	2.5
2015	1	1	1	0	1	2.95	3.35	2.95	3.35	3.5	4	3.4375
2015	1	1	1	0	1	2.45	2.8	3.1	3.85	4.1	4.6	2.75
2015	2	1	1	0	1	3.2	2.55	2.85	3.65	3.3	3.95	3.5
2015	2	1	1	0	1	2.3	3.5	3.1	3.95	3.65	4.25	1.75
2015	2	2	1	0	1	2.5	3.75	3.15	3.85	3.75	3.8	2.0625
2015	2	1	1	0	1	2.75	2.65	3.4	3.8	3.8	4.25	2.8125
2015	1	1	1	0	1	2.7	3	3.35	3.4	4.2	4.35	2.0625
2015	2	1	1	0	1	2.45	3.35	3.1	3.25	3.75	3.55	2.1875
2015	1	1	1	0	1	2.7	2.15	3.3	3.75	3.4	4.3	2.9375
2015	1	1	1	0	1	2.6	3.55	2.7	4.75	2.7	4.65	2.75
2015	2	1	1	0	1	2.6	3.25	2.85	4.2	3.2	3.55	2.4
2015	2	1	1	0	1	2.7	2.3	3.25	4.2	3.95	3.75	2.875
2015	2	1	1	0	1	3.25	2	2.4	4.35	4.1	3.85	2.75
2015	1	1	1	0	1	2.55	3.15	3.4	4	3.8	4.1	2.1875
2015	1	2	1	0	1	3.55	4.15	2.2	4.35	2.25	3.35	3.1875
2015	1	1	1	0	1	3.65	3.4	3.05	2.75	3.15	3.25	2.8125
2015	1	1	1	0	1	3.75	2.05	2.95	4	3.75	3.95	3.125
2015	2	1	1	0	1	2.63158	2.85	2.95	4.3	4.2	4.1	1.875
2015	2	1	1	0	1	2.65	1.85	3	4.5	4.15	4.75	2
2015	2	2	1	0	1	3.44444	3.16667	3.15789	3.72222	3.38889	4.05556	2.73333
2015	1	1	1	0	1	3.05	3.25	2.95	3.1	3.35	3.8	2.8125
2015	1	1	1	0	1	2.89474	3.95	2.7	2.9	2.3	3.2	2.0625
2015	1	2	1	0	1	2.25	2.5	3.3	3.6	4	3.75	1.1875
2015	1	1	1	0	1	2.35	3.1	3.2	3.1	3.65	4.15	2.625
2015	1	1	1	0	1	2.8	2.9	2.8	3.65	2.7	4.35	2.8125
2015	1	1	1	0	1	2.55	2.85	3.05	3.7	3.4	3.95	2.625
2015	1	1	1	0	1	2.9	3	2.68421	3.6	2.35	3.1	3.5
2015	1	1	1	0	1	2.95	2.85	3.1	2.7	3.35	4.35	1.375
2015	1	2	1	0	1	2.2	4.05	3.5	3.65	3.45	3.9	2.4375
2015	2	1	1	0	1	3.1	3.8	3.55	2.1	2	3.9	1.375
2015	1	1	1	0	1	1.95	3.85	3.55	2.6	2.7	3.89474	1.875
2015	1	1	1	0	1	2.3	3.1	3.15	3.15	3.55	4.35	2.3125
2014	2	2	1	1	2	2.3	2.8	3.4	4	3.7	4.4	2.25
2014	2	1	1	1	4	2.78947	2.7	3.55	3.8	4.31579	4.2	1.6875
2014	2	2	1	1	1	3.2	2.85	3.1	4.35	3.47368	4.4	1.9375
2014	2	2	1	1	4	2.95	2.95	3.5	3.4	3.25	3.55	1.875
2014	2	2	1	1	2	2.5	2.8	3.3	3.85	3.9	4	1.8125
2014	2	2	1	1	3	2.5	3.2	3.10526	3.94737	4.35	4.4	1.875
2014	1	1	1	1	2	2.2	2.95	3.15	3.7	3.55	3.85	1.5
2014	1	1	1	1	2	2.6	3	2.9	3.3	2.25	4.05	1.875
2014	1	2	1	1	4	2.5	2.9	3.3	3.7	3.5	4.2	1.875
2014	1	1	1	1	1	2.85	2.85	2.8	3.25	3.15	4.15	2.9375
2014	1	2	1	1	4	2.42105	2.6	2.85	4.25	3.85	3.35	2.5625
2014	1	2	1	1	2	2.57895	3.3	2.85	3.1	3.6	4.2	2.6875
2014	1	2	1	1	3	2.5	2.25	3.3	3.2	4.15	4.7	2.1875
2014	1	1	1	1	1	3.7	2.1	3.1	3.6	3.4	3.45	2.93333
2014	1	1	1	1	2	3.15	1.85	3.3	4.25	4.6	4.15	1.6875
2014	1	2	1	1	4	2.5	3	3.05	4.2	4.4	4.45	2.0625
2014	1	2	1	1	1	2.05	2.2	3.1	4.8	4.75	4.15	1.875
2014	1	1	1	1	1	2.45	2.6	3.25	4.35	4.6	4.2	2.0625
2014	1	2	1	1	3	2.75	3.1	3.25	2.55	3.95	3.75	1.375
2014	1	2	1	1	3	2.95	2.05	3.15789	4.05	3.95	4.05	2.86667
2014	1	1	1	1	1	2.75	2	2.95	3.55	3.8	4.10526	2.6875
2014	2	1	1	1	2	3.4	2.1	3.05	3.6	3.7	3.65	2.5625
2014	2	1	1	1	4	3.35	2.75	2.8	3.15	3.8	4.1	1.9375
2014	2	1	1	1	4	3.15	3.3	3.3	2.9	3.6	4.2	2.1875
2014	1	2	1	1	1	2.3	2.35	3.55	3.4	3.75	4.35	3.25
2014	1	1	1	1	1	2.7	1.95	3.15	3.95	3.5	3.35	2.625
2014	1	1	1	1	1	2.65	2.5	3.1	3.35	3.75	3.7	2.25
2014	1	2	1	1	1	2.5	2.75	3	3.25	4.15	4.5	3.5625
2014	1	2	1	1	1	2.47368	3.65	3.25	3.65	3.85	3.9	2.0625
2014	2	2	1	1	2	2.75	4.25	3.15	3.15789	2.05	4	2.0625
2014	1	2	1	1	2	2.15	3.31579	3.2	3.8	4.05	4.45	2.5
2014	2	1	1	1	2	2.1	2.05	3	3.55	4.6	4.25	2.8125
2014	2	2	1	1	1	2.47368	3.25	3.35	3.1	3.05	3.9	2.875
2014	2	2	1	1	1	2.77778	2.2	3.45	3.5	3.85	4.35	3.5
2014	2	1	1	1	1	3.25	3.75	3.1	2.7	3.45	3.5	2.1875
2014	1	1	1	1	1	2.47368	3.83333	3.25	4.5	2.65	3.85	2.1875
2014	2	1	1	1	1	2.35	3	2.9	4.05	3.25	3.55	1.75
2014	1	1	1	1	1	2.45	3.1	3.1	3.55	3.3	3.55	2.4375
2014	1	1	1	1	1	2.85	3.65	3.15	3.15	2.85	3.75	1.875
2015	1	2	1	1	1	2.95	2.22222	3.5	3.75	4.35	4.45	2
2015	1	2	1	1	1	2.75	1.65	2.95	3.95	4.3	4.75	2.3125
2015	2	1	1	1	1	2.85	2.1	2.85	3.85	3.75	4.2	3.6875
2015	2	1	1	1	1	3.15	2	2.9	3.8	3.65	4.6	2.5625
2015	2	1	1	1	1	2.6	3.05	3	3.95	3.7	4.2	3.1875
2015	2	1	1	1	1	3.25	2.3	3.5	4.55	4.2	4.25	1.8125
2015	1	2	1	1	1	2.55	4.1	3.15	2.3	3.95	3.85	1.375
2015	2	1	1	1	1	3	1.68421	3.05	4.35	4.35	4.1	2.25
2015	1	2	1	1	1	2.9	2.15	3.05	3.8	4.4	4.1	2.375
2015	2	2	1	1	1	3.3	2.25	2.85	4.25	4.25	4.3	2.6
2015	1	1	1	1	1	2.7	2.6	3	3.9	3.55	4.2	2.8125
2015	2	1	1	1	1	2.9	3.4	3.25	4.15	3.95	4.2	3.4375
2015	1	1	1	1	1	3.1	2.8	2.55	3.9	3.5	3.45	3.75
2015	1	1	1	1	1	2.55	2.5	3.2	4	4.25	3.95	1.75
2015	2	2	1	1	1	2.45	3.1	3.3	3.8	3.9	3.9	2.625
2015	2	2	1	1	1	3	3.15	3	3.75	3.55	4	4.0625
2015	2	2	1	1	1	3.55	1.8	3.2	4.6	4.5	4.3	2.5
2015	2	2	1	1	1	2.65	4.05	3.25	3.05	3.1	3.85	2.8125
2015	2	1	1	1	1	2.9	2.4	3.5	4.05	4.35	4.35	2.5625
2015	2	1	1	1	1	2.6	4	3.4	3.3	2.65	4.25	2.75
2015	2	1	1	1	1	3.15	1.75	2.9	3.45	3.5	3.15	2.8125
2015	2	1	1	1	1	3.3	2.47368	3.6	3.8	3.55	4.55	2.1875
2015	1	2	1	1	1	3.4	3.45	3.25	3.3	3.6	3.7	3.5
2015	1	2	1	1	1	2.8	2.6	2.5	4.3	3.15	3.4	2.125
2015	1	2	1	1	1	2.5	3.1	2.95	4.45	3.9	4.15	2.375
2015	1	1	1	1	1	2.55	2.6	2.9	3.95	3.7	4.2	2.8125
2015	1	2	1	1	1	3.5	3.3	3.2	4.55	3.7	3.9	1.5625
2015	1	2	1	1	1	2.65	3.4	3.3	4	3.25	3.9	2.0625
2015	1	1	1	1	1	2.55	2.25	3.25	4.2	4.4	3.35	1.375
2015	1	2	1	1	1	2.65	2.75	2.78947	4.15	4.15	4.3	2.73333
2015	1	2	1	1	1	3.15	2.4	3	3.15	3.65	3.55	1.5625
2015	1	2	1	1	1	2.25	2.85	2.95	4.4	4.25	4.35	3.0625
2015	1	1	1	1	1	2.7	3.05	3.05	4.3	3.85	4.05	2.625
2015	1	2	1	1	1	2.35	4.05	3.2	3.95	4.15	4.95	2.125
2015	2	1	1	1	1	2.4	2.5	2.75	3.9	4.1	3.9	2.375
2015	1	1	1	1	1	2.35	3.5	2.95	4.22222	3.95	4	1.75
2015	1	2	1	1	1	2.3	3.9	2.75	4.7	3.25	3.45	2.0625
2015	1	2	1	1	1	3.35	1.5	3.15	4.3	4.45	4.5	3.1875
2015	1	2	1	1	1	2.25	3.65	3.05	3.7	3.2	4	2
2015	1	1	1	1	1	3.4	1.55	2.8	4.15	4.15	4.4	3.75
2015	1	1	1	1	1	3.73684	2.42105	3.11111	4	3.72222	4.22222	1.8
2015	1	2	1	1	1	2.95	2.45	2.95	4.6	3.95	4.15	2.125
2015	2	2	1	1	1	3.75	1.75	3	4.15	4	3.85	3.0625
2015	2	2	1	1	1	2.75	4.1	2.9	4.5	3.7	4.1	2.5
2015	2	1	1	1	1	2.3	2.25	3.35	4.5	3.8	4	1.4375
2015	2	2	1	1	1	2.55	2.55	2.7	4.9	3.7	3.5	2.125
2015	1	1	1	1	1	2.73684	2.8	3.05	3.15	3.9	4.15	2
2015	2	1	1	1	1	2.7	2.3	2.75	4.35	3.85	3.7	2.6875
2015	1	1	1	1	1	2.15	2.65	2.9	3.8	3.35	4.1	2.25
2015	2	1	1	1	1	3.45	2.25	3.3	3.4	3.95	4.25	1.5625
2015	2	1	1	1	1	2.5	2.05	2.52632	4.6	4.15	4.57895	2.5
2015	1	2	1	1	1	3	1.6	3.25	4.65	4.3	4.6	3.625
2015	2	2	1	1	1	2.85	2.1	2.6	3.9	3.65	4.55	3.8125
2015	2	1	1	1	1	3.25	2.45	3.31579	3.45	3.75	3.65	1.6875
2015	1	1	1	1	1	3.3	2.2	3.45	3.89474	4.1	4.6	1.6875
2015	1	1	1	1	1	2.5	3.35	3.1	4.35	3.95	3.95	2.9375
2015	1	1	1	1	1	2.45	2.45	3.3	3.85	3.65	4.05	2.5
2015	2	1	1	1	1	3	2.4	3.25	3.9	3.15	4.45	3.4375
2015	2	1	1	1	1	2.7	2.35	3.1	4.5	4.1	4.45	2.5
2015	1	1	1	1	1	2.8	3.05	2.95	4.2	3.4	3.3	2.375
2015	2	2	1	1	1	1.8	3.4	2.95	3.85	4	4.45	2.25
2015	2	2	1	1	1	2.25	3	2.75	4.15	4.05	4.45	3.25
2015	1	2	1	1	1	3.1	2.25	3.15	4.2	4.25	4.65	3.4375
2015	1	2	1	1	1	1.95	3.75	3.1	4.05	2.65	4.15789	3.125
2015	1	2	1	1	1	3.15	2.95	3.15	3.95	3.95	2.95	3.375
2015	1	1	1	1	1	2.85	3.1	3	4.75	2.7	3.63158	2.1875
2015	2	1	1	1	1	2.1	3.25	2.95	4.1	3.05	3.4	2.8125
2015	1	1	1	1	1	2.6	3.4	3.1	3.85	3.85	3.9	1.875
2015	2	2	1	1	1	3.9	3.25	2.7	3.15	2.85	2.85	1.5625
2015	1	1	1	1	1	3.05263	1.85	2.95	3.8	3.85	4.1	3
2015	1	1	1	1	1	2.1	2.9	3.05	4	4.26316	3.75	1.8125
2015	1	2	1	1	1	3.15	2.75	3.1	3.63158	3.6	4.2	2.1875
2015	2	1	1	1	1	1.55	3.35	2.85	4.25	4	4.25	1.9375
2015	1	1	1	1	1	2.5	3.45	2.9	3.45	3.75	3.3	1.875
2015	1	1	1	1	1	4	3	3.15	4.25	3.4	4.45	2.4375
